# Supplementary material for: Independent evaluation of the accuracy of 5 artificial intelligence software for detecting lung nodules on chest X-rays
Source: PubMed Central journal article supplement — Quant Imaging Med Surg. 2024 Jul 25;14(8):5288–303. doi: 10.21037/qims-24-160 (PMC11320553; doi:10.21037/qims-24-160), 2024-07-25
Supplement: qims-14-08-5288-supplementary.pdf [file qims-14-08-5288-supplementary.pdf]

## Appendix 1

| study_id | GT | Celsus | Lunit INSIGHT CXR | qXR | Program for automated analysis of digital fluorograms | Care Mentor AI |
|----------|----|--------|-------------------|-----|-------------------------------------------------------|----------------|
| 1        | 0  | 45     | 0.18              | 11  | 0                                                     | 34             |
| 2        | 0  | 1      | 0.01              | 5   | 0                                                     | 28             |
| 3        | 1  | 77     | 0.96              | 52  | 99                                                    | 28             |
| 4        | 0  | 40     | 0.01              | 6   | 0                                                     | 28             |
| 5        | 0  | 4      | 0.01              | 1   | 0                                                     | 30             |
| 6        | 1  | 94     | 0.95              | 84  | 99                                                    | 68             |
| 7        | 0  | 61     | 0.04              | 12  | 0                                                     | 27             |
| 8        | 0  | 56     | 0.06              | 9   | 0                                                     | 28             |
| 9        | 1  | 54     | 0.03              | 15  | 0                                                     | 28             |
| 10       | 0  | 5      | 0.01              | 15  | 0                                                     | 25             |
| 11       | 0  | 7      | 0.16              | 6   | 0                                                     | 54             |
| 12       | 0  | 52     | 0.02              | 5   | 0                                                     | 89             |
| 13       | 0  | 6      | 0.01              | 3   | 0                                                     | 13             |
| 14       | 0  | 4      | 0.01              | 7   | 0                                                     | 31             |
| 15       | 0  | 29     | 0.25              | 5   | 0                                                     | 7              |
| 16       | 1  | 77     | 0.43              | 19  | 0                                                     | 42             |
| 17       | 0  | 0      | 0.01              | 7   | 0                                                     | 28             |
| 18       | 0  | 0      | 0.02              | 4   | 0                                                     | 14             |
| 19       | 0  | 0      | 0.01              | 8   | 0                                                     | 28             |
| 20       | 0  | 0      | 0.01              | 2   | 0                                                     | 28             |
| 21       | 1  | 76     | 0.96              | 84  | 84                                                    | 91             |
| 22       | 0  | 3      | 0.01              | 2   | 0                                                     | 8              |
| 23       | 0  | 30     | 0.16              | 91  | 0                                                     | 98             |
| 24       | 0  | 0      | 0                 | 1   | 0                                                     | 7              |
| 25       | 0  | 1      | 0.01              | 2   | 0                                                     | 6              |
| 26       | 1  | 65     | 0.77              | 83  | 99                                                    | 28             |
| 27       | 0  | 57     | 0.1               | 83  | 87                                                    | 34             |
| 28       | 0  | 21     | 0.05              | 6   | 0                                                     | 28             |
| 29       | 0  | 11     | 0.16              | 4   | 0                                                     | 33             |
| 30       | 0  | 24     | 0.01              | 56  | 0                                                     | 21             |
| 31       | 0  | 6      | 0.07              | 3   | 0                                                     | 33             |
| 32       | 0  | 9      | 0.01              | 5   | 0                                                     | 33             |
| 33       | 0  | 17     | 0.01              | 5   | 0                                                     | 28             |
| 34       | 0  | 70     | 0.05              | 12  | 99                                                    | 28             |
| 35       | 1  | 88     | 0.85              | 93  | 99                                                    | 80             |
| 36       | 0  | 0      | 0.01              | 6   | 0                                                     | 13             |
| 37       | 1  | 92     | 0.94              | 64  | 92                                                    | 21             |
| 38       | 0  | 3      | 0.01              | 3   | 0                                                     | 28             |
| 39       | 0  | 6      | 0.04              | 9   | 0                                                     | 28             |
| 40       | 0  | 1      | 0.01              | 8   | 0                                                     | 28             |
| 41       | 0  | 5      | 0.01              | 3   | 0                                                     | 14             |
| 42       | 0  | 1      | 0.02              | 2   | 0                                                     | 28             |
| 43       | 0  | 8      | 0.01              | 3   | 0                                                     | 28             |
| 44       | 1  | 11     | 0.04              | 12  | 0                                                     | 28             |
| 45       | 0  | 38     | 0.2               | 9   | 0                                                     | 31             |
| 46       | 0  | 6      | 0                 | 17  | 0                                                     | 32             |
| 47       | 0  | 4      | 0                 | 7   | 0                                                     | 10             |
| 48       | 0  | 8      | 0.07              | 3   | 0                                                     | 5              |
| 49       | 0  | 1      | 0                 | 6   | 0                                                     | 25             |
| 50       | 0  | 59     | 0.02              | 5   | 0                                                     | 25             |
| 51       | 0  | 55     | 0.1               | 11  | 0                                                     | 13             |

Appendix 1 (continued)

Appendix 1 (continued)

| study_id | GT | Celsus | Lunit INSIGHT CXR | qXR | Program for automated analysis of digital fluorograms | Care Mentor AI |
|----------|----|--------|-------------------|-----|-------------------------------------------------------|----------------|
| 52       | 1  | 97     | 0.99              | 98  | 99                                                    | 93             |
| 53       | 1  | 97     | 0.82              | 84  | 99                                                    | 92             |
| 54       | 0  | 3      | 0.01              | 6   | 0                                                     | 9              |
| 55       | 1  | 93     | 0.92              | 81  | 99                                                    | 99             |
| 56       | 0  | 75     | 0.12              | 12  | 0                                                     | 69             |
| 57       | 0  | 53     | 0.01              | 17  | 0                                                     | 8              |
| 58       | 0  | 4      | 0.04              | 6   | 0                                                     | 32             |
| 59       | 1  | 79     | 0.77              | 7   | 0                                                     | 28             |
| 60       | 0  | 4      | 0.01              | 4   | 0                                                     | 14             |
| 61       | 1  | 90     | 0.77              | 84  | 99                                                    | 24             |
| 62       | 1  | 79     | 0.93              | 81  | 98                                                    | 82             |
| 63       | 1  | 88     | 0.59              | 62  | 99                                                    | 68             |
| 64       | 1  | 79     | 0.82              | 8   | 77                                                    | 45             |
| 65       | 1  | 96     | 0.94              | 92  | 99                                                    | 73             |
| 66       | 1  | 80     | 0.96              | 90  | 49                                                    | 33             |
| 67       | 1  | 94     | 0.86              | 86  | 99                                                    | 88             |
| 68       | 1  | 48     | 0.72              | 59  | 0                                                     | 33             |
| 69       | 1  | 63     | 0.58              | 78  | 99                                                    | 6              |
| 70       | 1  | 91     | 0.96              | 83  | 99                                                    | 75             |
| 71       | 1  | 78     | 0.84              | 60  | 0                                                     | 28             |
| 72       | 1  | 4      | 0.05              | 5   | 0                                                     | 28             |
| 73       | 1  | 83     | 0.09              | 90  | 0                                                     | 97             |
| 74       | 1  | 93     | 0.65              | 87  | 61                                                    | 41             |
| 75       | 1  | 90     | 0.83              | 73  | 99                                                    | 70             |
| 76       | 1  | 91     | 0.88              | 93  | 99                                                    | 93             |
| 77       | 1  | 95     | 0.85              | 73  | 99                                                    | 91             |
| 78       | 1  | 66     | 0.14              | 66  | 99                                                    | 30             |
| 79       | 1  | 55     | 0.37              | 14  | 0                                                     | 30             |
| 80       | 1  | 66     | 0.13              | 16  | 0                                                     | 33             |
| 81       | 1  | 87     | 0.83              | 83  | 99                                                    | 72             |
| 82       | 1  | 67     | 0.35              | 59  | 0                                                     | 21             |
| 83       | 1  | 83     | 0.66              | 82  | 99                                                    | 28             |
| 84       | 1  | 82     | 0.08              | 13  | 98                                                    | 33             |
| 85       | 1  | 83     | 0.09              | 92  | 99                                                    | 56             |
| 86       | 1  | 91     | 0.68              | 72  | 73                                                    | 56             |
| 87       | 1  | 99     | 0.09              | 96  | 99                                                    | 91             |
| 88       | 1  | 94     | 0.08              | 90  | 99                                                    | 97             |
| 89       | 1  | 88     | 0.08              | 85  | 99                                                    | 79             |
| 90       | 1  | 10     | 0.08              | 4   | 0                                                     | 33             |
| 91       | 1  | 95     | 0.15              | 86  | 99                                                    | 97             |
| 92       | 1  | 77     | 0.05              | 72  | 99                                                    | 90             |
| 93       | 1  | 96     | 0.24              | 85  | 99                                                    | 86             |
| 94       | 1  | 87     | 0.13              | 88  | 99                                                    | 92             |
| 95       | 1  | 91     | 0.11              | 81  | 99                                                    | 97             |

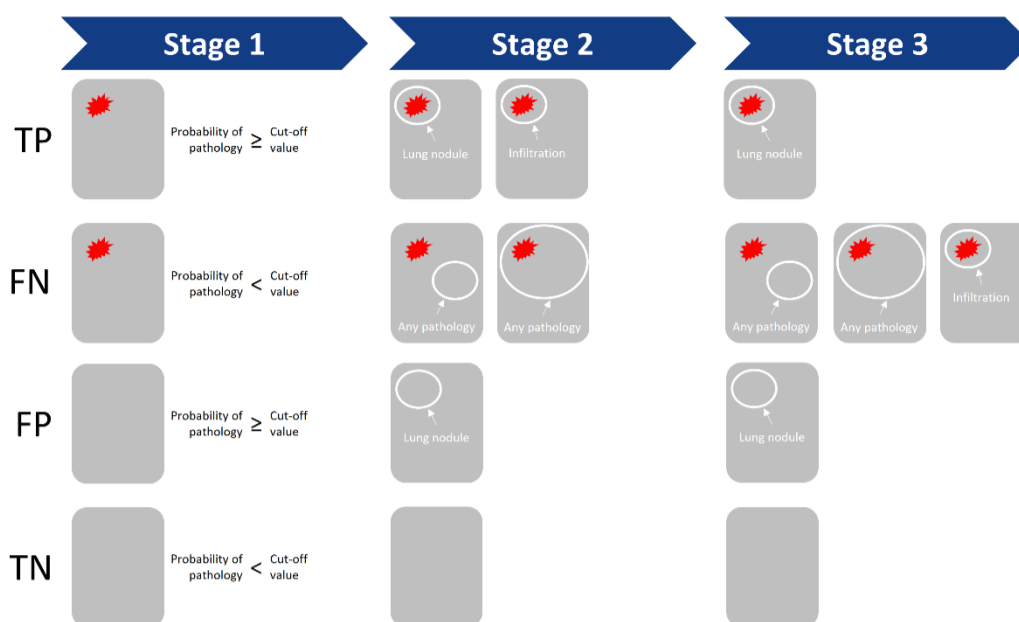

**Figure S1** Schematic illustration of the three stages of our study. The red figure schematically indicates a lung nodule that actually exists on CXR. White outline schematically indicates segmentation performed by the AI, white text indicates classification performed by the AI. TP, true positive; FN, false negative; FP, false positive; TN, true negative; CXR, chest X-ray; AI, artificial intelligence.

**Table S1** The results of the dataset analysis by the AI-based software solutions (translated into binary scale and compared to GT)

| Results        | Celsus | Lunit INSIGHT CXR | qXR | Program for automated analysis of digital fluorograms | Care Mentor AI |
|----------------|--------|-------------------|-----|-------------------------------------------------------|----------------|
| True positive  | 42     | 44                | 43  | 36                                                    | 29             |
| False negative | 6      | 4                 | 5   | 12                                                    | 19             |
| True negative  | 45     | 38                | 41  | 45                                                    | 43             |
| False positive | 2      | 9                 | 6   | 2                                                     | 4              |

GT, ground truth; AI, artificial intelligence; CXR, chest X-ray.

**Table S2** The results of the dataset analysis the AI-based software solutions, manually inspected by three radiologists for establishing the true/false segmentation of the nodule by the software

| Results        | Celsus | Lunit INSIGHT CXR | qXR | Program for automated analysis of digital fluorograms | Care Mentor AI |
|----------------|--------|-------------------|-----|-------------------------------------------------------|----------------|
| True positive  | 37     | 27                | 31  | 33                                                    | 20             |
| False negative | 11     | 20                | 17  | 15                                                    | 28             |
| True negative  | 47     | 47                | 47  | 47                                                    | 47             |
| False positive | 0      | 0                 | 0   | 0                                                     | 0              |

AI, artificial intelligence; CXR, chest X-ray.

**Table S3** The results of the dataset analysis the AI-based software solutions, manually inspected by three radiologists for establishing the true/false segmentation and classification of the nodule by the software

| Results        | Celsus | Lunit INSIGHT CXR | qXR | Program for automated analysis of digital fluorograms | Care Mentor AI |
|----------------|--------|-------------------|-----|-------------------------------------------------------|----------------|
| True positive  | 30     | 27                | 28  | 18                                                    | 16             |
| False negative | 18     | 20                | 20  | 30                                                    | 32             |
| True negative  | 47     | 47                | 47  | 47                                                    | 47             |
| False positive | 0      | 0                 | 0   | 0                                                     | 0              |

AI, artificial intelligence; CXR, chest X-ray.

| Stage 1 of the study                                  |                |                                                       |       |                   |        | Stage 2 of the study                                  |                |                   |       |                                                       |        | Stage 3 of the study                                  |                |                                                       |       |                   |        |
|-------------------------------------------------------|----------------|-------------------------------------------------------|-------|-------------------|--------|-------------------------------------------------------|----------------|-------------------|-------|-------------------------------------------------------|--------|-------------------------------------------------------|----------------|-------------------------------------------------------|-------|-------------------|--------|
| Sensitivity                                           |                |                                                       |       |                   |        | Sensitivity                                           |                |                   |       |                                                       |        | Sensitivity                                           |                |                                                       |       |                   |        |
|                                                       | Care Mentor AI | Program for automated analysis of digital fluorograms | qXR   | Lunit INSIGHT CXR | Celsus |                                                       | Care Mentor AI | Lunit INSIGHT CXR | qXR   | Program for automated analysis of digital fluorograms | Celsus |                                                       | Care Mentor AI | Program for automated analysis of digital fluorograms | qXR   | Lunit INSIGHT CXR | Celsus |
| Care Mentor AI                                        | 0.604          | 0.043                                                 | 0.001 | 0.001             | 0.001  | Care Mentor AI                                        | 0.417          | 0.136             | 0.015 | 0.002                                                 | 0.000  | Care Mentor AI                                        | 0.333          | 0.803                                                 | 0.006 | 0.019             | 0.002  |
| Program for automated analysis of digital fluorograms |                | 0.750                                                 | 0.114 | 0.070             | 0.041  | Lunit INSIGHT CXR                                     |                | 0.574             | 0.823 | 0.332                                                 | 0.027  | Program for automated analysis of digital fluorograms |                | 0.375                                                 | 0.024 | 0.029             | 0.014  |
| qXR                                                   |                |                                                       | 0.854 | 1.000             | 0.683  | qXR                                                   |                |                   | 0.646 | 0.546                                                 | 0.096  | qXR                                                   |                |                                                       | 0.583 | 1.000             | 0.803  |
| Lunit INSIGHT CXR                                     |                |                                                       |       | 0.920             | 1.000  | Program for automated analysis of digital fluorograms |                |                   |       | 0.690                                                 | 0.221  | Lunit INSIGHT CXR                                     |                |                                                       |       | 0.574             | 0.789  |
| Celsus                                                |                |                                                       |       |                   | 0.875  | Celsus                                                |                |                   |       |                                                       | 0.770  | Celsus                                                |                |                                                       |       |                   | 0.625  |
| Specificity                                           |                |                                                       |       |                   |        | Specificity                                           |                |                   |       |                                                       |        | Specificity                                           |                |                                                       |       |                   |        |
|                                                       | Care Mentor AI | Program for automated analysis of digital fluorograms | qXR   | Lunit INSIGHT CXR | Celsus |                                                       | Care Mentor AI | Lunit INSIGHT CXR | qXR   | Program for automated analysis of digital fluorograms | Celsus |                                                       | Care Mentor AI | Program for automated analysis of digital fluorograms | qXR   | Lunit INSIGHT CXR | Celsus |
| Care Mentor AI                                        | 0.910          | 0.617                                                 | 0.724 | 0.077             | 0.617  | Care Mentor AI                                        | 1.000          | 1.000             | 1.000 | 1.000                                                 | 1.000  | Care Mentor AI                                        | 1.000          | 1.000                                                 | 1.000 | 1.000             | 1.000  |
| Program for automated analysis of digital fluorograms |                | 0.960                                                 | 0.221 | 0.016             | 1.000  | Lunit INSIGHT CXR                                     |                | 1.000             | 1.000 | 1.000                                                 | 1.000  | Program for automated analysis of digital fluorograms |                | 1.000                                                 | 1.000 | 1.000             | 1.000  |
| qXR                                                   |                |                                                       | 0.830 | 0.386             | 0.289  | qXR                                                   |                |                   | 1.000 | 1.000                                                 | 1.000  | qXR                                                   |                |                                                       | 1.000 | 1.000             | 1.000  |
| Lunit INSIGHT CXR                                     |                |                                                       |       | 0.810             | 0.016  | Program for automated analysis of digital fluorograms |                |                   |       | 1.000                                                 | 1.000  | Lunit INSIGHT CXR                                     |                |                                                       |       | 1.000             | 1.000  |
| Celsus                                                |                |                                                       |       |                   | 0.960  | Celsus                                                |                |                   |       |                                                       | 1.000  | Celsus                                                |                |                                                       |       |                   | 1.000  |
| Accuracy                                              |                |                                                       |       |                   |        | Accuracy                                              |                |                   |       |                                                       |        | Accuracy                                              |                |                                                       |       |                   |        |
|                                                       | Care Mentor AI | Program for automated analysis of digital fluorograms | qXR   | Lunit INSIGHT CXR | Celsus |                                                       | Care Mentor AI | Lunit INSIGHT CXR | qXR   | Program for automated analysis of digital fluorograms | Celsus |                                                       | Care Mentor AI | Program for automated analysis of digital fluorograms | qXR   | Lunit INSIGHT CXR | Celsus |
| Care Mentor AI                                        | 0.760          | 0.239                                                 | 0.002 | 0.000             | 0.010  | Care Mentor AI                                        | 0.705          | 0.136             | 0.015 | 0.002                                                 | 0.000  | Care Mentor AI                                        | 0.663          | 0.803                                                 | 0.006 | 0.019             | 0.002  |
| Program for automated analysis of digital fluorograms |                | 0.850                                                 | 0.024 | 0.001             | 0.018  | Lunit INSIGHT CXR                                     |                | 0.787             | 0.823 | 0.332                                                 | 0.027  | Program for automated analysis of digital fluorograms |                | 0.684                                                 | 0.024 | 0.029             | 0.014  |
| qXR                                                   |                |                                                       | 0.880 | 0.331             | 0.423  | qXR                                                   |                |                   | 0.820 | 0.546                                                 | 0.096  | qXR                                                   |                |                                                       | 0.789 | 1.000             | 0.803  |
| Lunit INSIGHT CXR                                     |                |                                                       |       | 0.860             | 0.077  | Program for automated analysis of digital fluorograms |                |                   |       | 0.842                                                 | 0.221  | Lunit INSIGHT CXR                                     |                |                                                       |       | 0.787             | 0.789  |
| Celsus                                                |                |                                                       |       |                   | 0.916  | Celsus                                                |                |                   |       |                                                       | 0.884  | Celsus                                                |                |                                                       |       |                   | 0.810  |

**Figure S2** Paired comparison of five models in terms of sensitivity, specificity, and accuracy (using McNemar's test). Statistically significant results are colored green. The numbers colored in peach represent the values obtained at a certain stage of the experiment. AI, artificial intelligence; CXR, chest X-ray.
